# Supplementary material for: Chiral footprint of the ligand layer in the all-alkynyl-protected gold nanocluster Au144(CCPhF)60
Source: Royal Society of Chemistry journal article supplement (doi:10.1039/c9cc04914b), 2019-01-01
Supplement: c9cc04914b1.pdf [file c9cc04914b1.pdf]

ELECTRONIC SUPPLEMENTARY INFORMATION (ESI) FOR

**CHIRAL FOOTPRINT OF THE LIGAND LAYER IN THE ALL-ALKYNYL-PROTECTED GOLD  
NANOCLUSTER Au<sub>144</sub>(CCPhF)<sub>60</sub>**

Sami Malola<sup>a</sup> and Hannu Häkkinen<sup>a,b,\*</sup>

<sup>a</sup> Department of Physics, Nanoscience Center, University of Jyväskylä, FI-40014 Jyväskylä, Finland

<sup>b</sup> Department of Chemistry, Nanoscience Center, University of Jyväskylä, FI-40014 Jyväskylä,  
Finland

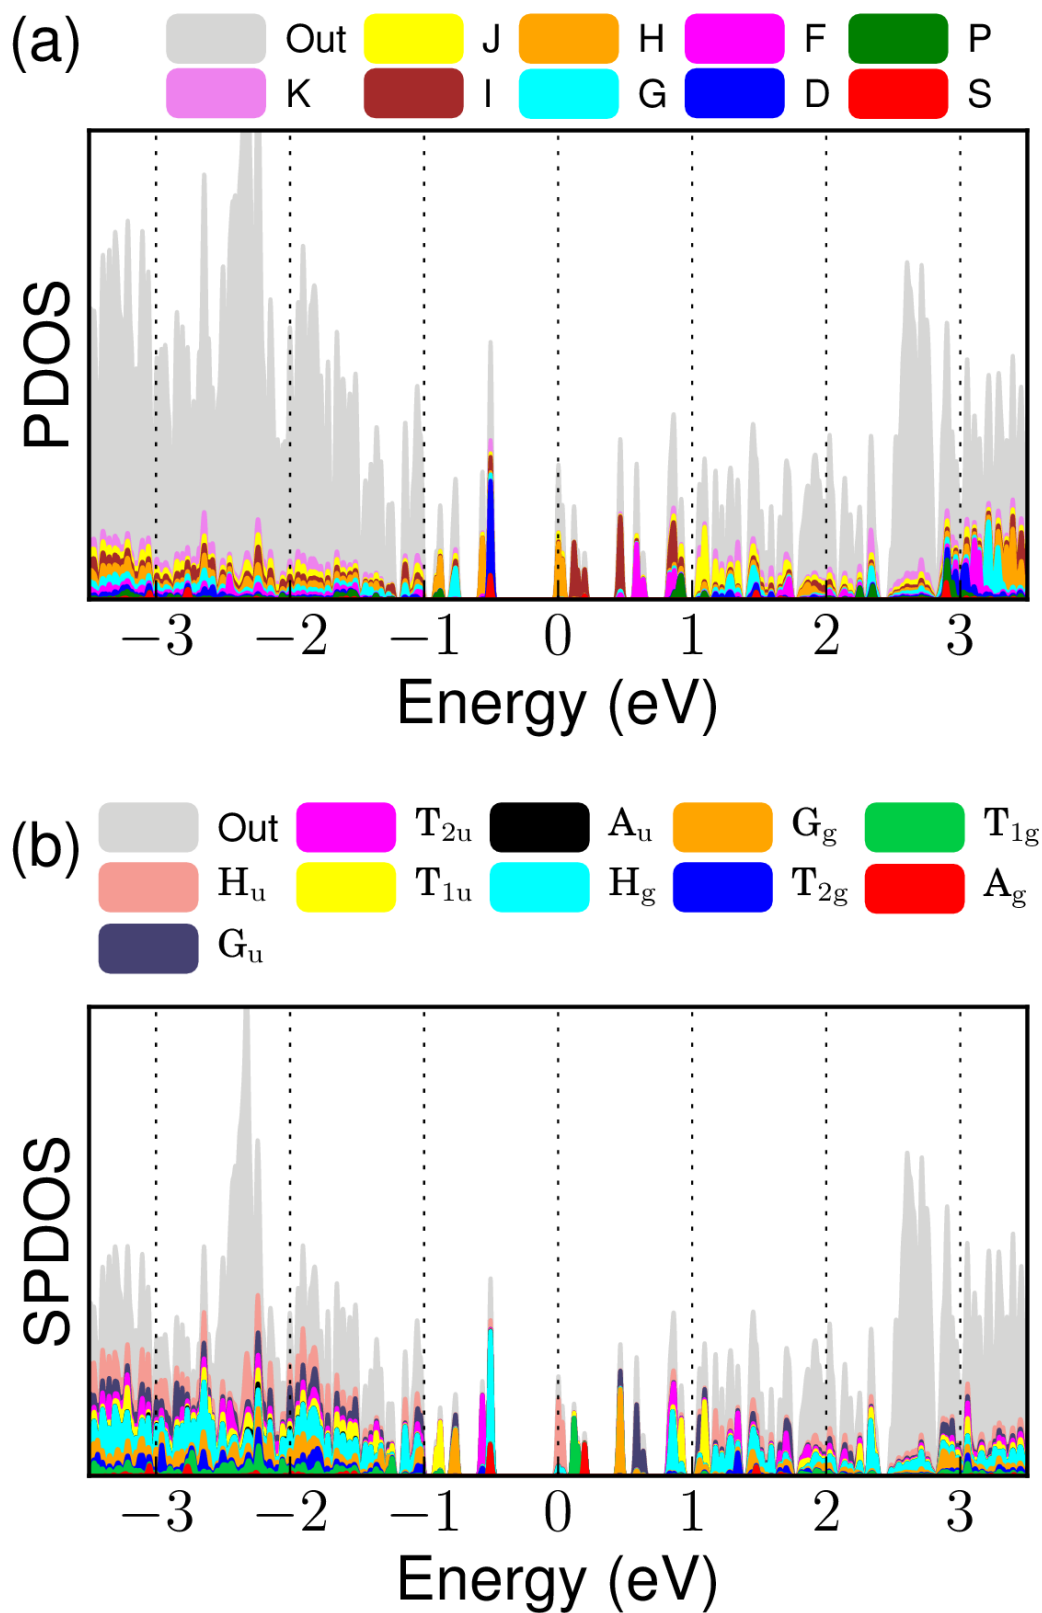

**FIG. S1** Projection of the electron density of states (PDOS) of  $Au_{144}(CCPhF)_{60}$  cluster to (a) spherical harmonics and to (b)  $I_h$  symmetry group representations. The HOMO energy is set to zero and the states are broadened with 0.01 eV gaussian.

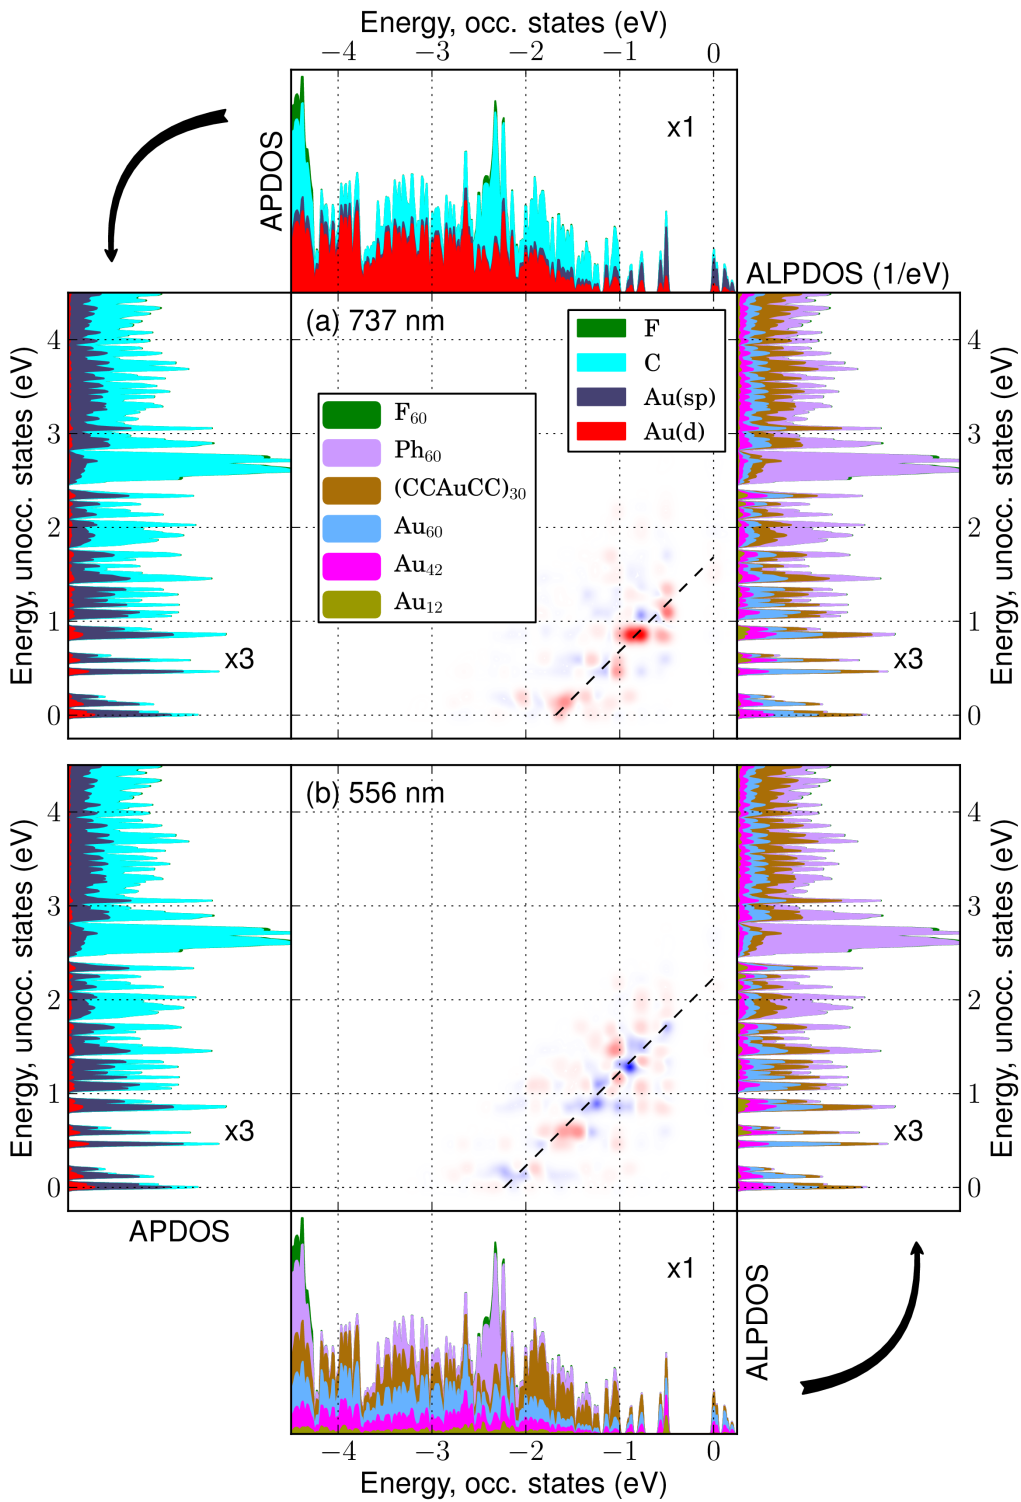

**FIG. S2** RTCM analysis of selected peaks (at 737 nm and at 556 nm) of the CD spectrum of  $\text{Au}_{144}(\text{CCPhF})_{60}$  shown in Fig. 2a. The red/blue spots denote constructive/destructive contributions to the rotational strengths. The single electron DOS is presented either as projected to local atomic orbitals (APDOS, bottom and right panels) or by layer-by-layer manner (ALPDOS, top and left panels). The dashed diagonal lines denote the electron-hole (e-h) energy equaling the peak position ( $\epsilon_e - \epsilon_h = hc / \lambda$ ). The HOMO energy is at zero.

**List of atomic coordinates of Au<sub>144</sub>(CCPhF)<sub>60</sub> (unit: Å)**

924 atoms

|    |           |           |           |
|----|-----------|-----------|-----------|
| Au | 12.850740 | 24.044474 | 22.605623 |
| Au | 15.708740 | 24.266474 | 23.276625 |
| Au | 16.794741 | 21.767473 | 23.952623 |
| Au | 18.327742 | 20.882473 | 21.641623 |
| Au | 15.878740 | 22.296474 | 21.263624 |
| Au | 17.473742 | 21.375473 | 19.076624 |
| Au | 14.998741 | 22.804474 | 18.558622 |
| Au | 14.982740 | 20.087475 | 19.566624 |
| Au | 13.187740 | 20.913473 | 17.579622 |
| Au | 13.170741 | 18.136475 | 18.588623 |
| Au | 11.261741 | 20.087475 | 19.566624 |
| Au | 12.841741 | 21.076473 | 14.671623 |
| Au | 14.759741 | 22.942472 | 15.749621 |
| Au | 15.887741 | 20.612474 | 16.846622 |
| Au | 15.683741 | 20.715473 | 14.042623 |
| Au | 18.246740 | 20.929474 | 15.165623 |
| Au | 17.109741 | 21.585474 | 11.626623 |
| Au | 19.706741 | 21.786474 | 12.922623 |
| Au | 19.706741 | 12.169474 | 22.605623 |
| Au | 18.085741 | 14.534473 | 23.276625 |
| Au | 19.706741 | 16.723475 | 23.952623 |
| Au | 19.706741 | 18.493473 | 21.641623 |
| Au | 19.706741 | 15.665473 | 21.263624 |
| Au | 19.706741 | 17.508472 | 19.076624 |
| Au | 19.706741 | 14.649472 | 18.558622 |
| Au | 22.068741 | 15.994474 | 19.566624 |
| Au | 22.250742 | 14.027473 | 17.579622 |
| Au | 24.663742 | 15.400475 | 18.588623 |
| Au | 23.928741 | 12.771475 | 19.566624 |
| Au | 22.281742 | 13.645473 | 14.671623 |
| Au | 19.706741 | 14.374474 | 15.749621 |
| Au | 21.160740 | 16.515474 | 16.846622 |
| Au | 21.173740 | 16.287474 | 14.042623 |
| Au | 19.706741 | 18.400475 | 15.165623 |
| Au | 19.706741 | 17.087475 | 11.626623 |
| Au | 18.234741 | 19.236473 | 12.922623 |
| Au | 26.563742 | 24.044474 | 22.605623 |
| Au | 25.325741 | 21.458473 | 23.276625 |
| Au | 22.619741 | 21.767473 | 23.952623 |
| Au | 21.086740 | 20.882473 | 21.641623 |
| Au | 23.535742 | 22.296474 | 21.263624 |
| Au | 21.939741 | 21.375473 | 19.076624 |
| Au | 24.414742 | 22.804474 | 18.558622 |

|    |           |           |           |
|----|-----------|-----------|-----------|
| Au | 22.069740 | 24.177473 | 19.566624 |
| Au | 23.682741 | 25.318474 | 17.579622 |
| Au | 21.285740 | 26.722473 | 18.588623 |
| Au | 23.930740 | 27.399473 | 19.566624 |
| Au | 23.996740 | 25.536474 | 14.671623 |
| Au | 24.653742 | 22.942472 | 15.749621 |
| Au | 22.072741 | 23.130474 | 16.846622 |
| Au | 22.263741 | 23.256474 | 14.042623 |
| Au | 21.166740 | 20.929474 | 15.165623 |
| Au | 22.303741 | 21.585474 | 11.626623 |
| Au | 21.178741 | 19.236473 | 12.922623 |
| Au | 12.850740 | 16.127474 | 16.523623 |
| Au | 15.708740 | 15.906472 | 15.852623 |
| Au | 16.794741 | 18.404474 | 15.176621 |
| Au | 18.327742 | 19.289474 | 17.487623 |
| Au | 15.878740 | 17.875473 | 17.864624 |
| Au | 17.473742 | 18.797474 | 20.051622 |
| Au | 14.998741 | 17.367474 | 20.569624 |
| Au | 13.187740 | 19.259474 | 21.549623 |
| Au | 13.170741 | 22.036474 | 20.540625 |
| Au | 12.841741 | 19.095474 | 24.457624 |
| Au | 14.759741 | 17.230474 | 23.379622 |
| Au | 15.887741 | 19.559473 | 22.282621 |
| Au | 15.683741 | 19.457474 | 25.086622 |
| Au | 18.246740 | 19.243473 | 23.963625 |
| Au | 17.109741 | 18.586473 | 27.501623 |
| Au | 19.706741 | 18.386475 | 26.205622 |
| Au | 19.706741 | 28.003473 | 16.523623 |
| Au | 18.085741 | 25.638474 | 15.852623 |
| Au | 19.706741 | 23.449472 | 15.176621 |
| Au | 19.706741 | 21.679474 | 17.487623 |
| Au | 19.706741 | 24.507473 | 17.864624 |
| Au | 19.706741 | 22.664474 | 20.051622 |
| Au | 19.706741 | 25.523474 | 20.569624 |
| Au | 22.250742 | 26.145473 | 21.549623 |
| Au | 24.663742 | 24.771475 | 20.540625 |
| Au | 22.281742 | 26.526474 | 24.457624 |
| Au | 19.706741 | 25.798471 | 23.379622 |
| Au | 21.160740 | 23.657475 | 22.282621 |
| Au | 21.173740 | 23.885473 | 25.086622 |
| Au | 19.706741 | 21.771475 | 23.963625 |
| Au | 19.706741 | 23.085474 | 27.501623 |
| Au | 18.234741 | 20.936474 | 26.205622 |
| Au | 26.563742 | 16.127474 | 16.523623 |
| Au | 25.325741 | 18.714474 | 15.852623 |
| Au | 22.619741 | 18.404474 | 15.176621 |
| Au | 21.086740 | 19.289474 | 17.487623 |

|    |           |           |           |
|----|-----------|-----------|-----------|
| Au | 23.535742 | 17.875473 | 17.864624 |
| Au | 21.939741 | 18.797474 | 20.051622 |
| Au | 24.414742 | 17.367474 | 20.569624 |
| Au | 23.682741 | 14.854472 | 21.549623 |
| Au | 21.285740 | 13.450474 | 20.540625 |
| Au | 23.996740 | 14.636475 | 24.457624 |
| Au | 24.653742 | 17.230474 | 23.379622 |
| Au | 22.072741 | 17.041471 | 22.282621 |
| Au | 22.263741 | 16.916471 | 25.086622 |
| Au | 21.166740 | 19.243473 | 23.963625 |
| Au | 22.303741 | 18.586473 | 27.501623 |
| Au | 21.178741 | 20.936474 | 26.205622 |
| Au | 23.704741 | 24.266474 | 23.276625 |
| Au | 24.430740 | 20.087475 | 19.566624 |
| Au | 26.225740 | 20.913473 | 17.579622 |
| Au | 26.242741 | 18.136475 | 18.588623 |
| Au | 28.152740 | 20.087475 | 19.566624 |
| Au | 26.571741 | 21.076473 | 14.671623 |
| Au | 23.526741 | 20.612474 | 16.846622 |
| Au | 23.730742 | 20.715473 | 14.042623 |
| Au | 21.327742 | 14.534473 | 23.276625 |
| Au | 17.345741 | 15.994474 | 19.566624 |
| Au | 17.163740 | 14.027473 | 17.579622 |
| Au | 14.749741 | 15.400475 | 18.588623 |
| Au | 15.484740 | 12.771475 | 19.566624 |
| Au | 17.131741 | 13.645473 | 14.671623 |
| Au | 18.253740 | 16.515474 | 16.846622 |
| Au | 18.239740 | 16.287474 | 14.042623 |
| Au | 14.087741 | 21.458473 | 23.276625 |
| Au | 17.343740 | 24.177473 | 19.566624 |
| Au | 15.731741 | 25.318474 | 17.579622 |
| Au | 18.127741 | 26.722473 | 18.588623 |
| Au | 15.483741 | 27.399473 | 19.566624 |
| Au | 15.416740 | 25.536474 | 14.671623 |
| Au | 17.340740 | 23.130474 | 16.846622 |
| Au | 17.149740 | 23.256474 | 14.042623 |
| Au | 23.704741 | 15.906472 | 15.852623 |
| Au | 26.225740 | 19.259474 | 21.549623 |
| Au | 26.242741 | 22.036474 | 20.540625 |
| Au | 26.571741 | 19.095474 | 24.457624 |
| Au | 23.526741 | 19.559473 | 22.282621 |
| Au | 23.730742 | 19.457474 | 25.086622 |
| Au | 21.327742 | 25.638474 | 15.852623 |
| Au | 17.163740 | 26.145473 | 21.549623 |
| Au | 14.749741 | 24.771475 | 20.540625 |
| Au | 17.131741 | 26.526474 | 24.457624 |
| Au | 18.253740 | 23.657475 | 22.282621 |

|    |           |           |           |
|----|-----------|-----------|-----------|
| Au | 18.239740 | 23.885473 | 25.086622 |
| Au | 14.087741 | 18.714474 | 15.852623 |
| Au | 15.731741 | 14.854472 | 21.549623 |
| Au | 18.127741 | 13.450474 | 20.540625 |
| Au | 15.416740 | 14.636475 | 24.457624 |
| Au | 17.340740 | 17.041471 | 22.282621 |
| Au | 17.149740 | 16.916471 | 25.086622 |
| F  | 10.895831 | 24.300678 | 18.295597 |
| F  | 19.904375 | 13.101474 | 10.099419 |
| F  | 19.657461 | 18.496712 | 8.098169  |
| C  | 10.966342 | 18.401941 | 18.444885 |
| C  | 10.098611 | 17.825165 | 17.771652 |
| C  | 9.142188  | 17.142004 | 16.993279 |
| C  | 8.255647  | 17.802847 | 16.115385 |
| C  | 7.346724  | 17.085907 | 15.343684 |
| C  | 7.309342  | 15.689672 | 15.418054 |
| C  | 8.169622  | 15.005715 | 16.281109 |
| C  | 9.058008  | 15.737823 | 17.056190 |
| C  | 10.555868 | 22.029306 | 16.723547 |
| C  | 11.552710 | 21.503626 | 16.199921 |
| C  | 9.455033  | 22.695181 | 17.301495 |
| C  | 8.127367  | 22.244370 | 17.124413 |
| C  | 7.051293  | 22.950853 | 17.648081 |
| C  | 7.272898  | 24.135157 | 18.357544 |
| C  | 8.572206  | 24.600842 | 18.568501 |
| C  | 9.640289  | 23.872267 | 18.061022 |
| C  | 12.471489 | 24.448580 | 14.229459 |
| C  | 17.574757 | 14.676459 | 11.604777 |
| C  | 17.481314 | 19.695757 | 10.890194 |
| C  | 17.526064 | 18.861538 | 9.968348  |
| C  | 18.541061 | 17.753923 | 7.983070  |
| C  | 17.490351 | 17.913765 | 8.917871  |
| C  | 16.368105 | 17.064289 | 8.756971  |
| C  | 16.291174 | 16.146736 | 7.716232  |
| C  | 17.339075 | 16.042767 | 6.795163  |
| C  | 18.471521 | 16.844835 | 6.934471  |
| C  | 12.605785 | 13.208602 | 17.811331 |
| C  | 13.473017 | 27.414181 | 17.113874 |
| F  | 11.694964 | 23.104040 | 11.900346 |
| C  | 13.654126 | 24.497223 | 14.602711 |
| C  | 11.125398 | 24.400620 | 13.809120 |
| C  | 10.742999 | 23.720015 | 12.632133 |
| C  | 9.425857  | 23.655731 | 12.199828 |
| C  | 8.433470  | 24.290594 | 12.950941 |
| C  | 8.770105  | 24.975574 | 14.122912 |
| C  | 10.092983 | 25.028238 | 14.545815 |
| C  | 21.974388 | 18.722242 | 10.031785 |

|   |           |           |           |
|---|-----------|-----------|-----------|
| C | 21.844286 | 14.538701 | 11.624354 |
| C | 21.930414 | 14.561727 | 12.863818 |
| C | 21.804390 | 14.543249 | 10.210651 |
| C | 22.743729 | 15.298275 | 9.469141  |
| C | 22.736254 | 15.314456 | 8.080606  |
| C | 21.782867 | 14.571347 | 7.377822  |
| C | 20.831053 | 13.825609 | 8.073236  |
| C | 20.847973 | 13.823935 | 9.461067  |
| F | 18.500757 | 21.103432 | 8.098087  |
| F | 13.895319 | 23.490692 | 10.098451 |
| C | 13.879423 | 21.052063 | 11.627163 |
| C | 13.814818 | 20.937040 | 12.863049 |
| C | 13.931055 | 21.098370 | 10.213331 |
| C | 14.011528 | 19.896111 | 9.469116  |
| C | 14.029798 | 19.894087 | 8.080562  |
| C | 13.968875 | 21.102549 | 7.379472  |
| C | 13.918333 | 22.309816 | 8.076486  |
| C | 13.912203 | 22.298548 | 9.465341  |
| F | 21.304316 | 20.696772 | 8.099533  |
| C | 21.209339 | 18.310436 | 10.921394 |
| C | 22.507080 | 20.096693 | 8.036574  |
| C | 22.860876 | 19.133114 | 9.009510  |
| C | 24.164007 | 18.587069 | 8.914391  |
| C | 25.034731 | 18.949492 | 7.893893  |
| C | 24.631203 | 19.877382 | 6.927775  |
| C | 23.364542 | 20.457905 | 7.004249  |
| F | 25.693195 | 23.507000 | 10.098195 |
| C | 25.468439 | 20.850517 | 11.624777 |
| C | 20.504738 | 22.282745 | 10.921453 |
| C | 19.789970 | 22.730858 | 10.008833 |
| C | 18.368570 | 22.437557 | 8.006061  |
| C | 18.999197 | 23.262434 | 8.965665  |
| C | 18.795387 | 24.656864 | 8.838626  |
| C | 18.031738 | 25.185783 | 7.804785  |
| C | 17.440487 | 24.335340 | 6.863794  |
| C | 17.605963 | 22.954027 | 6.966421  |
| C | 16.134569 | 24.656893 | 11.624054 |
| C | 23.527479 | 24.632442 | 11.628245 |
| C | 23.426279 | 24.743782 | 12.862147 |
| C | 23.553293 | 24.575520 | 10.214105 |
| C | 22.455109 | 25.069914 | 9.468454  |
| C | 22.446371 | 25.058914 | 8.080124  |
| C | 23.543249 | 24.548693 | 7.378684  |
| C | 24.637074 | 24.035406 | 8.076340  |
| C | 24.627171 | 24.042707 | 9.465016  |
| F | 20.500771 | 10.296344 | 18.097088 |
| C | 25.557753 | 13.366754 | 18.475351 |



|   |           |           |           |
|---|-----------|-----------|-----------|
| C | 26.552519 | 12.982388 | 17.840792 |
| C | 27.646082 | 12.526023 | 17.073997 |
| C | 27.501812 | 11.484029 | 16.129902 |
| C | 28.579441 | 11.050145 | 15.366598 |
| C | 29.832306 | 11.653853 | 15.514549 |
| C | 30.010090 | 12.687288 | 16.436159 |
| C | 28.927034 | 13.099391 | 17.201975 |
| C | 22.696255 | 11.196722 | 16.692055 |
| C | 22.603596 | 12.332767 | 16.199543 |
| C | 22.678495 | 9.900430  | 17.244074 |
| C | 23.758919 | 8.998591  | 17.118923 |
| C | 23.672892 | 7.704530  | 17.618183 |
| C | 22.502989 | 7.275929  | 18.254782 |
| C | 21.420897 | 8.145817  | 18.406830 |
| C | 21.527578 | 9.441902  | 17.922461 |
| C | 19.575312 | 11.659427 | 14.164742 |
| C | 29.235546 | 17.275511 | 17.884117 |
| C | 16.535368 | 11.018537 | 17.142845 |
| F | 21.297733 | 11.498419 | 11.901121 |
| C | 18.924351 | 12.645518 | 14.549391 |
| C | 20.281609 | 10.486697 | 13.805650 |
| C | 21.133703 | 10.411033 | 12.680817 |
| C | 21.827190 | 9.257440  | 12.341306 |
| C | 21.687790 | 8.117191  | 13.133933 |
| C | 20.851461 | 8.147120  | 14.254454 |
| C | 20.165697 | 9.309621  | 14.583342 |
| F | 27.702925 | 25.901976 | 18.493452 |
| C | 22.608000 | 28.500534 | 18.470091 |
| C | 22.530943 | 29.555754 | 17.822952 |
| C | 22.392080 | 30.740610 | 17.074013 |
| C | 23.366922 | 31.194153 | 16.159056 |
| C | 23.162165 | 32.347408 | 15.409491 |
| C | 21.977358 | 33.076763 | 15.550613 |
| C | 21.000570 | 32.666679 | 16.461325 |
| C | 21.225979 | 31.518684 | 17.208752 |
| C | 25.924902 | 27.108736 | 16.705524 |
| C | 24.986963 | 26.467813 | 16.202505 |
| C | 27.031834 | 27.805019 | 17.239233 |
| C | 27.299723 | 29.149984 | 16.896076 |
| C | 28.439777 | 29.799553 | 17.355589 |
| C | 29.345064 | 29.122047 | 18.178995 |
| C | 29.098312 | 27.802017 | 18.559912 |
| C | 27.950253 | 27.167124 | 18.103411 |
| C | 27.123823 | 24.174452 | 14.276557 |
| C | 17.391434 | 29.742785 | 17.862675 |
| C | 29.158535 | 21.833925 | 17.113604 |
| F | 26.503239 | 25.502222 | 11.899651 |

|   |           |           |           |
|---|-----------|-----------|-----------|
| C | 26.554771 | 23.125122 | 14.617420 |
| C | 27.778116 | 25.365458 | 13.897665 |
| C | 27.452944 | 26.033504 | 12.696541 |
| C | 28.072525 | 27.210478 | 12.302395 |
| C | 29.065031 | 27.756662 | 13.119476 |
| C | 29.421797 | 27.122814 | 14.314013 |
| C | 28.786852 | 25.948385 | 14.699341 |
| C | 14.004386 | 13.888552 | 14.234709 |
| C | 17.297569 | 28.056421 | 14.159362 |
| C | 27.926537 | 18.235651 | 14.241636 |
| F | 25.303295 | 15.500977 | 11.694376 |
| C | 25.594440 | 15.054932 | 15.082273 |
| C | 25.572056 | 14.278465 | 14.112609 |
| C | 25.550287 | 13.505387 | 12.933519 |
| C | 25.632969 | 12.095534 | 12.913399 |
| C | 25.633390 | 11.397012 | 11.711013 |
| C | 25.553892 | 12.084105 | 10.495049 |
| C | 25.455151 | 13.477181 | 10.479303 |
| C | 25.440205 | 14.155892 | 11.687850 |
| F | 21.099161 | 27.106157 | 11.694923 |
| C | 21.134886 | 27.708635 | 15.100850 |
| C | 21.851742 | 28.050486 | 14.146951 |
| C | 22.589561 | 28.399626 | 12.997713 |
| C | 23.748913 | 29.205450 | 13.035269 |
| C | 24.421511 | 29.545101 | 11.867229 |
| C | 23.953735 | 29.090467 | 10.630045 |
| C | 22.821671 | 28.274799 | 10.558744 |
| C | 22.171789 | 27.932138 | 11.734831 |
| F | 12.897415 | 17.497675 | 11.693419 |
| C | 12.394603 | 17.509579 | 15.095004 |
| C | 11.747209 | 17.935020 | 14.124126 |
| C | 11.097996 | 18.368540 | 12.950606 |
| C | 9.869976  | 19.067135 | 12.948125 |
| C | 9.265017  | 19.443888 | 11.754403 |
| C | 9.867082  | 19.135345 | 10.531289 |
| C | 11.092316 | 18.463150 | 10.497861 |
| C | 11.690159 | 18.109621 | 11.698678 |
| F | 17.905603 | 26.703377 | 11.294520 |
| C | 16.592478 | 23.542187 | 11.926189 |
| C | 14.890577 | 28.528275 | 10.448232 |
| C | 13.928342 | 27.537071 | 10.670660 |
| C | 14.309658 | 26.262135 | 11.074153 |
| C | 15.674871 | 25.938475 | 11.250453 |
| C | 16.607271 | 26.975594 | 11.051236 |
| C | 16.245644 | 28.251678 | 10.647248 |
| F | 14.894717 | 15.102256 | 11.294144 |
| C | 18.277678 | 15.652158 | 11.917473 |

|   |           |           |           |
|---|-----------|-----------|-----------|
| C | 14.931863 | 11.574206 | 10.452169 |
| C | 16.283937 | 11.282277 | 10.664478 |
| C | 17.167025 | 12.281652 | 11.056355 |
| C | 16.722370 | 13.611430 | 11.236282 |
| C | 15.347056 | 13.854897 | 11.049789 |
| C | 14.454062 | 12.871401 | 10.654838 |
| F | 26.497763 | 18.296518 | 11.294678 |
| C | 24.269365 | 21.020229 | 11.909698 |
| C | 29.491758 | 20.155390 | 10.457777 |
| C | 29.055817 | 21.462227 | 10.700216 |
| C | 27.747683 | 21.703543 | 11.106479 |
| C | 26.823631 | 20.643637 | 11.267419 |
| C | 27.320761 | 19.340467 | 11.060219 |
| C | 28.620375 | 19.082123 | 10.649895 |
| F | 12.898847 | 11.498734 | 15.091729 |
| C | 15.158088 | 14.184370 | 14.584738 |
| C | 12.705717 | 13.506308 | 13.841579 |
| C | 11.907094 | 14.302596 | 12.988382 |
| C | 10.636317 | 13.887909 | 12.606227 |
| C | 10.127924 | 12.665270 | 13.058197 |
| C | 10.892716 | 11.854630 | 13.901652 |
| C | 12.155131 | 12.284444 | 14.281266 |
| F | 15.892860 | 30.107067 | 15.245241 |
| C | 16.904642 | 26.937752 | 14.526914 |
| C | 17.625635 | 29.382771 | 13.813252 |
| C | 18.662321 | 29.735640 | 12.921466 |
| C | 18.912403 | 31.070625 | 12.618092 |
| C | 18.133718 | 32.083881 | 13.189057 |
| C | 17.104544 | 31.767197 | 14.079836 |
| C | 16.874342 | 30.433430 | 14.379276 |
| F | 30.500807 | 18.302330 | 15.288817 |
| C | 27.093927 | 19.095510 | 14.571952 |
| C | 28.896502 | 17.282757 | 13.864847 |
| C | 28.619982 | 16.244534 | 12.944890 |
| C | 29.598372 | 15.322545 | 12.589125 |
| C | 30.883854 | 15.412177 | 13.134193 |
| C | 31.189674 | 16.424971 | 14.046159 |
| C | 30.201359 | 17.332939 | 14.398817 |
| F | 31.302502 | 15.297439 | 17.901670 |
| F | 30.702158 | 23.902477 | 18.099985 |
| C | 28.023287 | 17.066444 | 17.689568 |
| C | 32.427223 | 19.244398 | 18.127203 |
| C | 31.077482 | 18.917992 | 18.074930 |
| C | 30.622307 | 17.579245 | 18.019398 |
| C | 31.638266 | 16.602163 | 18.011570 |
| C | 32.992405 | 16.904837 | 18.066425 |
| C | 33.395844 | 18.238415 | 18.124239 |

|   |           |           |           |
|---|-----------|-----------|-----------|
| C | 28.371702 | 21.228010 | 17.858103 |
| C | 31.900961 | 24.145977 | 16.080954 |
| C | 30.911602 | 23.516939 | 16.822849 |
| C | 30.116938 | 22.474447 | 16.301027 |
| C | 30.353518 | 22.092607 | 14.959776 |
| C | 31.326321 | 22.730505 | 14.198207 |
| C | 32.103912 | 23.751310 | 14.756019 |
| F | 9.892499  | 12.501875 | 17.902267 |
| F | 17.701385 | 8.696918  | 18.101151 |
| C | 12.982430 | 14.384120 | 17.653973 |
| C | 12.638552 | 9.452602  | 17.982004 |
| C | 13.075596 | 10.770487 | 17.927605 |
| C | 12.172640 | 11.858146 | 17.924488 |
| C | 10.808869 | 11.513593 | 17.964708 |
| C | 10.349021 | 10.205914 | 18.025867 |
| C | 11.273600 | 9.160744  | 18.035772 |
| C | 16.377983 | 12.013098 | 17.867846 |
| C | 17.274384 | 7.507319  | 16.108601 |
| C | 17.204775 | 8.680176  | 16.846476 |
| C | 16.624449 | 9.862553  | 16.341682 |
| C | 16.109741 | 9.816698  | 15.025490 |
| C | 16.187227 | 8.652341  | 14.269538 |
| C | 16.765018 | 7.497595  | 14.808173 |
| F | 18.103422 | 32.502712 | 17.902649 |
| F | 10.897824 | 27.699677 | 18.099964 |
| C | 18.167177 | 28.785692 | 17.687860 |
| C | 14.109442 | 31.553652 | 18.056316 |
| C | 15.053612 | 30.535679 | 18.001308 |
| C | 16.443142 | 30.798807 | 17.979115 |
| C | 16.798380 | 32.161667 | 17.993771 |
| C | 14.396996 | 27.035757 | 17.851059 |
| C | 10.078773 | 28.572346 | 16.068991 |
| C | 11.127700 | 28.059727 | 16.818710 |
| C | 12.433148 | 27.913141 | 16.302095 |
| C | 12.643268 | 28.311769 | 14.960844 |
| C | 11.595578 | 28.809141 | 14.193142 |
| C | 10.316441 | 28.943520 | 14.743258 |
| H | 26.516897 | 11.030928 | 16.024248 |
| H | 24.286438 | 30.618361 | 16.062601 |
| H | 8.303616  | 18.889473 | 16.060055 |
| C | 15.872057 | 33.195499 | 18.053942 |
| C | 14.511003 | 32.891026 | 18.088539 |
| H | 15.566105 | 17.133175 | 9.490873  |
| H | 15.416317 | 15.501930 | 7.630185  |
| H | 17.282301 | 15.328532 | 5.972378  |
| H | 19.316948 | 16.768667 | 6.251579  |
| H | 24.480986 | 17.886730 | 9.684690  |

|   |           |           |           |
|---|-----------|-----------|-----------|
| H | 26.035818 | 18.518341 | 7.858548  |
| H | 25.307718 | 20.161203 | 6.120908  |
| H | 23.030445 | 21.204475 | 6.284181  |
| H | 23.468868 | 15.881398 | 10.032073 |
| H | 23.466003 | 15.921146 | 7.543640  |
| H | 21.769964 | 14.575109 | 6.287425  |
| H | 20.064535 | 13.249578 | 7.555300  |
| H | 27.412590 | 22.715719 | 11.313830 |
| H | 29.739983 | 22.301310 | 10.570820 |
| H | 30.515270 | 19.963261 | 10.134576 |
| H | 28.939081 | 18.050228 | 10.509596 |
| H | 25.366199 | 14.034428 | 9.547713  |
| H | 25.692146 | 11.568806 | 13.863919 |
| H | 25.694822 | 10.309012 | 11.720965 |
| H | 25.554054 | 11.536667 | 9.551758  |
| H | 18.214705 | 12.059022 | 11.242270 |
| H | 16.651976 | 10.265558 | 10.526096 |
| H | 14.242804 | 10.787994 | 10.141563 |
| H | 13.400430 | 13.121833 | 10.532110 |
| H | 14.073605 | 18.965031 | 10.029617 |
| H | 14.107653 | 18.949465 | 7.540923  |
| H | 13.971075 | 21.108278 | 6.289127  |
| H | 13.897909 | 23.269270 | 7.559898  |
| H | 17.144178 | 22.264406 | 6.260775  |
| H | 16.840946 | 24.746490 | 6.051217  |
| H | 17.884600 | 26.263851 | 7.737917  |
| H | 19.236149 | 25.308977 | 9.590854  |
| H | 24.099226 | 29.549513 | 14.005983 |
| H | 25.317459 | 30.163715 | 11.918567 |
| H | 24.477467 | 29.356697 | 9.711530  |
| H | 22.458923 | 27.887993 | 9.608274  |
| H | 26.595690 | 29.662573 | 16.241116 |
| H | 28.627108 | 30.835344 | 17.071426 |
| H | 30.243307 | 29.627836 | 18.536631 |
| H | 29.774193 | 27.255375 | 19.215799 |
| F | 20.302975 | 31.102175 | 18.095343 |
| H | 20.070086 | 33.215679 | 16.593943 |
| H | 23.926825 | 32.676006 | 14.705126 |
| H | 21.811337 | 33.970684 | 14.948639 |
| H | 19.263769 | 28.936907 | 12.490328 |
| H | 19.724890 | 31.325386 | 11.937538 |
| H | 18.330809 | 33.128380 | 12.945887 |
| H | 16.488384 | 32.535099 | 14.547071 |
| H | 17.013939 | 29.012741 | 10.515632 |
| H | 14.586512 | 29.526588 | 10.131935 |
| H | 12.870604 | 27.760120 | 10.530013 |
| H | 13.564563 | 25.492802 | 11.263949 |

|   |           |           |           |
|---|-----------|-----------|-----------|
| H | 16.235838 | 34.223343 | 18.064699 |
| H | 13.771852 | 33.692257 | 18.129305 |
| H | 13.050904 | 31.296253 | 18.069773 |
| H | 14.730416 | 29.499783 | 17.946751 |
| H | 27.767439 | 27.680613 | 11.367237 |
| H | 29.555532 | 28.684402 | 12.823396 |
| H | 30.189960 | 27.555090 | 14.954976 |
| H | 29.050346 | 25.454817 | 15.633834 |
| H | 30.332462 | 19.708885 | 18.043171 |
| H | 32.720078 | 20.293224 | 18.158621 |
| H | 34.457939 | 18.484488 | 18.153992 |
| H | 33.710735 | 16.085138 | 18.051153 |
| H | 32.177334 | 16.518135 | 14.496663 |
| H | 31.652153 | 14.688654 | 12.858117 |
| H | 29.353939 | 14.522702 | 11.889700 |
| H | 27.614740 | 16.181328 | 12.532793 |
| F | 29.093954 | 14.093076 | 18.094858 |
| H | 30.969145 | 13.186071 | 16.562536 |
| H | 30.675373 | 11.325239 | 14.906300 |
| H | 28.444435 | 10.245384 | 14.643911 |
| H | 24.661741 | 9.339692  | 16.613077 |
| H | 24.519857 | 7.026686  | 17.512405 |
| H | 22.435961 | 6.262400  | 18.650869 |
| H | 20.504133 | 7.846552  | 18.911638 |
| H | 22.472563 | 9.274104  | 11.463217 |
| H | 22.237860 | 7.210729  | 12.878638 |
| H | 20.743826 | 7.263636  | 14.884062 |
| H | 19.520832 | 9.343305  | 15.459388 |
| H | 15.657498 | 10.720170 | 14.619064 |
| H | 15.790744 | 8.646080  | 13.254434 |
| H | 16.827055 | 6.583323  | 14.216530 |
| H | 17.729057 | 6.623555  | 16.554501 |
| H | 14.137486 | 10.988036 | 17.863327 |
| H | 13.373332 | 8.647980  | 17.975338 |
| H | 10.926261 | 8.127987  | 18.077469 |
| H | 9.274422  | 10.029305 | 18.058266 |
| H | 12.315935 | 15.252497 | 12.648387 |
| H | 10.526067 | 10.896420 | 14.268798 |
| H | 10.037986 | 14.522088 | 11.950842 |
| H | 9.134547  | 12.335587 | 12.751899 |
| F | 9.895867  | 15.101628 | 17.896137 |
| H | 6.673164  | 17.616489 | 14.669897 |
| H | 6.610862  | 15.125761 | 14.798546 |
| H | 8.168902  | 13.919229 | 16.353077 |
| H | 11.588877 | 18.237896 | 9.555948  |
| H | 9.392096  | 19.429089 | 9.594418  |
| H | 8.318227  | 19.984373 | 11.776112 |

|   |           |           |           |
|---|-----------|-----------|-----------|
| H | 9.413016  | 19.301550 | 13.907135 |
| H | 21.603832 | 25.451227 | 10.028529 |
| H | 21.574566 | 25.434639 | 7.542884  |
| H | 23.544235 | 24.538662 | 6.288513  |
| H | 25.498629 | 23.611883 | 7.560454  |
| H | 32.491230 | 24.937401 | 16.542662 |
| H | 32.869160 | 24.248346 | 14.158182 |
| H | 31.480852 | 22.429981 | 13.161603 |
| H | 29.746759 | 21.292130 | 14.537249 |
| H | 10.362927 | 25.551844 | 15.461376 |
| H | 9.194305  | 23.109642 | 11.286012 |
| H | 7.395385  | 24.247993 | 12.619102 |
| H | 7.994548  | 25.462885 | 14.714827 |
| H | 13.644821 | 28.211376 | 14.543335 |
| H | 11.777258 | 29.096783 | 13.157329 |
| H | 9.497778  | 29.337166 | 14.139917 |
| H | 9.095358  | 28.668554 | 16.528746 |
| H | 8.774492  | 25.509842 | 19.132458 |
| H | 6.430731  | 24.698801 | 18.760571 |
| H | 6.037303  | 22.579100 | 17.498526 |
| H | 7.964592  | 21.331047 | 16.552551 |
| F | 10.896589 | 15.897956 | 20.904255 |
| F | 19.708355 | 26.899008 | 29.098944 |
| F | 19.496138 | 21.505234 | 31.100719 |
| C | 10.975931 | 21.771116 | 20.684914 |
| C | 10.125484 | 22.368559 | 21.361115 |
| C | 9.188168  | 23.083231 | 22.131950 |
| C | 8.246994  | 22.450436 | 22.973171 |
| C | 7.344941  | 23.199493 | 23.721573 |
| C | 7.372145  | 24.596621 | 23.662979 |
| C | 8.296376  | 25.253145 | 22.846045 |
| C | 9.179458  | 24.491112 | 22.093109 |
| C | 10.537321 | 18.192549 | 22.413158 |
| C | 11.547382 | 18.697563 | 22.930855 |
| C | 9.439155  | 17.522354 | 21.835205 |
| C | 8.109594  | 17.981409 | 21.970428 |
| C | 7.043846  | 17.261276 | 21.443365 |
| C | 7.275781  | 16.055199 | 20.773487 |
| C | 8.578417  | 15.579102 | 20.609259 |
| C | 9.636331  | 16.324514 | 21.112858 |
| C | 12.497884 | 15.766969 | 24.957460 |
| C | 17.565775 | 25.496874 | 27.499092 |
| C | 17.443926 | 20.481131 | 28.221384 |
| C | 17.455557 | 21.314018 | 29.143160 |
| C | 18.440777 | 22.336342 | 31.171827 |
| C | 17.422667 | 22.258245 | 30.193480 |
| C | 16.357351 | 23.184200 | 30.306011 |

|   |           |           |           |
|---|-----------|-----------|-----------|
| C | 16.304790 | 24.106085 | 31.344158 |
| C | 17.320793 | 24.136402 | 32.305702 |
| C | 18.396637 | 23.252062 | 32.215538 |
| C | 12.611268 | 26.961264 | 21.290365 |
| C | 13.486092 | 12.756963 | 22.041565 |
| F | 11.693136 | 17.095491 | 27.298841 |
| C | 13.671691 | 15.698529 | 24.560247 |
| C | 11.150275 | 15.817189 | 25.368984 |
| C | 10.750417 | 16.488682 | 26.545446 |
| C | 9.424698  | 16.547510 | 26.952961 |
| C | 8.447222  | 15.917773 | 26.178520 |
| C | 8.804088  | 15.237365 | 25.009811 |
| C | 10.133735 | 15.190420 | 24.611303 |
| C | 21.888029 | 21.366583 | 29.150244 |
| C | 21.771202 | 25.618462 | 27.513979 |
| C | 21.908823 | 25.614613 | 26.277580 |
| C | 21.717049 | 25.596912 | 28.930382 |
| C | 22.708427 | 24.894724 | 29.660011 |
| C | 22.720385 | 24.863810 | 31.048105 |
| C | 21.730190 | 25.535923 | 31.770020 |
| C | 20.722525 | 26.220913 | 31.091351 |
| C | 20.719540 | 26.238478 | 29.702454 |
| F | 18.499292 | 19.090570 | 31.099579 |
| F | 13.895568 | 16.704723 | 29.097473 |
| C | 13.902987 | 19.125210 | 27.524611 |
| C | 13.814571 | 19.227566 | 26.286922 |
| C | 13.975207 | 19.093563 | 28.942652 |
| C | 14.099569 | 20.296442 | 29.682106 |
| C | 14.132386 | 20.309996 | 31.070358 |
| C | 14.042573 | 19.112309 | 31.785353 |
| C | 13.953479 | 17.903109 | 31.097918 |
| C | 13.937802 | 17.904974 | 29.709206 |
| F | 21.300835 | 19.305923 | 31.097851 |
| C | 21.167000 | 21.823755 | 28.244370 |
| C | 22.474688 | 19.962378 | 31.138433 |
| C | 22.778938 | 20.950939 | 30.171486 |
| C | 24.065742 | 21.538578 | 30.265745 |
| C | 24.959249 | 21.197206 | 31.273016 |
| C | 24.602335 | 20.241953 | 32.230732 |
| C | 23.357710 | 19.619455 | 32.155571 |
| F | 25.692833 | 16.495275 | 29.100574 |
| C | 25.474468 | 19.193398 | 27.518717 |
| C | 20.491835 | 17.914923 | 28.219322 |
| C | 19.757977 | 17.481268 | 29.125219 |
| C | 18.352589 | 17.754028 | 31.150785 |
| C | 18.961884 | 16.944458 | 30.163485 |
| C | 18.740042 | 15.549678 | 30.263828 |



|   |           |           |           |
|---|-----------|-----------|-----------|
| C | 17.990585 | 15.005118 | 31.299541 |
| C | 17.428095 | 15.839640 | 32.271660 |
| C | 17.603720 | 17.220430 | 32.192242 |
| C | 16.211720 | 15.477386 | 27.530722 |
| C | 23.491575 | 15.498253 | 27.512243 |
| C | 23.402098 | 15.413953 | 26.274788 |
| C | 23.508410 | 15.519795 | 28.928596 |
| C | 22.385614 | 15.048203 | 29.653370 |
| C | 22.362474 | 15.024960 | 31.041536 |
| C | 23.470963 | 15.472624 | 31.766407 |
| C | 24.589256 | 15.961632 | 31.091957 |
| C | 24.593948 | 15.990730 | 29.703266 |
| F | 20.502556 | 29.903944 | 20.905254 |
| C | 25.550884 | 26.807476 | 20.679314 |
| C | 26.518520 | 27.217358 | 21.339947 |
| C | 27.570492 | 27.726467 | 22.132374 |
| C | 27.369532 | 28.826839 | 22.997719 |
| C | 28.404076 | 29.327423 | 23.780657 |
| C | 29.670130 | 28.734810 | 23.733519 |
| C | 29.902321 | 27.643400 | 22.895538 |
| C | 28.863228 | 27.162516 | 22.109245 |
| C | 22.633944 | 28.988655 | 22.441465 |
| C | 22.574507 | 27.848213 | 22.929041 |
| C | 22.623220 | 30.292496 | 21.906027 |
| C | 23.687286 | 31.199478 | 22.113220 |
| C | 23.628119 | 32.501190 | 21.631510 |
| C | 22.496161 | 32.936157 | 20.934002 |
| C | 21.429846 | 32.064430 | 20.704138 |
| C | 21.512276 | 30.757698 | 21.166748 |
| C | 19.605125 | 28.468693 | 25.004974 |
| C | 29.241579 | 22.910170 | 21.322277 |
| C | 16.528593 | 29.154726 | 22.005266 |
| F | 21.296637 | 28.507275 | 27.297649 |
| C | 18.928928 | 27.513140 | 24.588444 |
| C | 20.333323 | 29.610212 | 25.412056 |
| C | 21.164289 | 29.627655 | 26.555664 |
| C | 21.861891 | 30.760893 | 26.953138 |
| C | 21.750614 | 31.931791 | 26.200556 |
| C | 20.948345 | 31.952841 | 25.055285 |
| C | 20.253479 | 30.813684 | 24.669617 |
| F | 27.704731 | 14.492311 | 20.710663 |
| C | 22.602728 | 11.677752 | 20.671181 |
| C | 22.546633 | 10.626621 | 21.326452 |
| C | 22.427563 | 9.435126  | 22.067181 |
| C | 23.428541 | 8.970334  | 22.947899 |
| C | 23.250662 | 7.800676  | 23.678244 |
| C | 22.065109 | 7.069614  | 23.553507 |

|   |           |           |           |
|---|-----------|-----------|-----------|
| C | 21.057545 | 7.497512  | 22.683905 |
| C | 21.256542 | 8.659977  | 21.952183 |
| C | 25.944393 | 13.122414 | 22.400364 |
| C | 24.989822 | 13.722653 | 22.921808 |
| C | 27.098116 | 12.504645 | 21.874197 |
| C | 27.420376 | 11.159604 | 22.168596 |
| C | 28.624514 | 10.600739 | 21.758059 |
| C | 29.544426 | 11.377739 | 21.046202 |
| C | 29.245243 | 12.699864 | 20.710747 |
| C | 28.021538 | 13.236732 | 21.091961 |
| C | 27.040592 | 15.984471 | 24.981295 |
| C | 17.379011 | 10.446972 | 21.265892 |
| C | 29.177216 | 18.292765 | 21.967268 |
| F | 26.304764 | 14.499750 | 27.296967 |
| C | 26.536966 | 17.046818 | 24.579168 |
| C | 27.669060 | 14.775085 | 25.358324 |
| C | 27.293222 | 14.037309 | 26.503664 |
| C | 27.899740 | 12.838052 | 26.853508 |
| C | 28.929396 | 12.335217 | 26.056543 |
| C | 29.341625 | 13.041996 | 24.922018 |
| C | 28.721432 | 14.237118 | 24.579365 |
| C | 14.015864 | 26.216267 | 24.962147 |
| C | 17.251925 | 12.074211 | 24.930243 |
| C | 27.892273 | 21.934710 | 24.948940 |
| F | 25.304068 | 24.702450 | 27.504511 |
| C | 25.595026 | 25.107046 | 24.056173 |
| C | 25.544498 | 25.872181 | 25.033007 |
| C | 25.487820 | 26.667362 | 26.195501 |
| C | 25.511471 | 28.079502 | 26.164742 |
| C | 25.480324 | 28.820711 | 27.340363 |
| C | 25.427841 | 28.171961 | 28.578548 |
| C | 25.382563 | 26.776962 | 28.644236 |
| C | 25.395395 | 26.053534 | 27.461674 |
| F | 21.095930 | 12.897610 | 27.504435 |
| C | 21.131187 | 12.464906 | 24.042408 |
| C | 21.845419 | 12.099482 | 24.991177 |
| C | 22.597111 | 11.711007 | 26.120155 |
| C | 23.770283 | 10.928128 | 26.037962 |
| C | 24.459373 | 10.544703 | 27.182520 |
| C | 24.002541 | 10.936440 | 28.445160 |
| C | 22.857584 | 11.728282 | 28.563091 |
| C | 22.187895 | 12.106339 | 27.409462 |
| F | 13.094523 | 22.504364 | 27.502752 |
| C | 12.422120 | 22.683176 | 24.067780 |
| C | 11.812606 | 22.289198 | 25.075729 |
| C | 11.169082 | 21.889994 | 26.265312 |
| C | 9.867967  | 21.338421 | 26.288593 |

|   |           |           |           |
|---|-----------|-----------|-----------|
| C | 9.256222  | 20.997160 | 27.489466 |
| C | 9.919802  | 21.205202 | 28.702209 |
| C | 11.213573 | 21.731930 | 28.714115 |
| C | 11.821580 | 22.041100 | 27.506378 |
| F | 17.903221 | 13.300004 | 27.904922 |
| C | 16.632635 | 16.604681 | 27.217495 |
| C | 14.769301 | 11.662610 | 28.702772 |
| C | 13.866982 | 12.701741 | 28.455002 |
| C | 14.328055 | 13.951971 | 28.058485 |
| C | 15.711900 | 14.206592 | 27.902580 |
| C | 16.582096 | 13.119040 | 28.121235 |
| C | 16.138950 | 11.868964 | 28.527382 |
| F | 14.894088 | 25.096418 | 27.905802 |
| C | 18.277802 | 24.521826 | 27.204870 |
| C | 14.972662 | 28.648668 | 28.629892 |
| C | 16.316854 | 28.926441 | 28.360701 |
| C | 17.183489 | 27.910028 | 27.974621 |
| C | 16.728010 | 26.576828 | 27.856062 |
| C | 15.359726 | 26.347769 | 28.096767 |
| C | 14.483779 | 27.347172 | 28.491554 |
| F | 26.498522 | 21.707388 | 27.905111 |
| C | 24.274509 | 19.089106 | 27.210951 |
| C | 29.500736 | 19.835209 | 28.683786 |
| C | 29.057356 | 18.532940 | 28.427996 |
| C | 27.745056 | 18.301712 | 28.029819 |
| C | 26.828547 | 19.369434 | 27.887968 |
| C | 27.328701 | 20.666887 | 28.115086 |
| C | 28.632336 | 20.915833 | 28.516668 |
| F | 12.898137 | 28.505562 | 23.946430 |
| C | 15.167285 | 25.960600 | 24.577223 |
| C | 12.713998 | 26.600183 | 25.341015 |
| C | 11.920639 | 25.863478 | 26.249477 |
| C | 10.639489 | 26.289370 | 26.583500 |
| C | 10.117717 | 27.463106 | 26.028824 |
| C | 10.879035 | 28.218229 | 25.132309 |
| C | 12.153089 | 27.778326 | 24.805637 |
| F | 15.897308 | 9.899299  | 23.909788 |
| C | 16.883013 | 13.204921 | 24.572807 |
| C | 17.607014 | 10.761971 | 25.310041 |
| C | 18.654947 | 10.477298 | 26.216776 |
| C | 18.956573 | 9.166101  | 26.569403 |
| C | 18.218878 | 8.102796  | 26.036840 |
| C | 17.177633 | 8.349108  | 25.138529 |
| C | 16.895809 | 9.661296  | 24.786524 |
| F | 30.502750 | 21.699213 | 24.105682 |
| C | 27.077993 | 21.077333 | 24.571306 |
| C | 28.863796 | 22.877241 | 25.345318 |

|   |           |           |           |
|---|-----------|-----------|-----------|
| C | 28.568817 | 23.976879 | 26.183468 |
| C | 29.556171 | 24.893005 | 26.530190 |
| C | 30.866173 | 24.730515 | 26.065378 |
| C | 31.192318 | 23.647299 | 25.245173 |
| C | 30.194435 | 22.748390 | 24.897999 |
| F | 31.302114 | 24.902376 | 21.297867 |
| F | 30.699894 | 16.099100 | 21.099777 |
| C | 28.018768 | 23.097240 | 21.456930 |
| C | 32.435593 | 20.951206 | 21.176172 |
| C | 31.085192 | 21.275152 | 21.221462 |
| C | 30.631527 | 22.614716 | 21.239677 |
| C | 31.643061 | 23.597347 | 21.228762 |
| C | 32.997211 | 23.294733 | 21.182531 |
| C | 33.401218 | 21.960255 | 21.154865 |
| C | 28.378668 | 18.927660 | 21.259848 |
| C | 31.850719 | 15.947968 | 23.149197 |
| C | 30.894016 | 16.563108 | 22.353813 |
| C | 30.125603 | 17.660133 | 22.799801 |
| C | 30.367390 | 18.116743 | 24.117348 |
| C | 31.312941 | 17.500597 | 24.929016 |
| C | 32.056278 | 16.417759 | 24.448545 |
| F | 9.891494  | 27.696819 | 21.297739 |
| F | 17.701958 | 31.502270 | 21.097359 |
| C | 12.990431 | 25.787920 | 21.460495 |
| C | 12.660753 | 30.716673 | 21.094761 |
| C | 13.086955 | 29.394436 | 21.132618 |
| C | 12.177882 | 28.312901 | 21.178400 |
| C | 10.817783 | 28.672579 | 21.193775 |
| C | 10.366507 | 29.984030 | 21.150398 |
| C | 11.297698 | 31.021950 | 21.100237 |
| C | 16.369953 | 28.165600 | 21.271971 |
| C | 17.287786 | 32.645542 | 23.115671 |
| C | 17.207972 | 31.489275 | 22.352451 |
| C | 16.618744 | 30.298519 | 22.827806 |
| C | 16.095755 | 30.324265 | 24.141836 |
| C | 16.178076 | 31.472736 | 24.921638 |
| C | 16.774788 | 32.631718 | 24.414909 |
| F | 18.103668 | 7.696955  | 21.297853 |
| F | 10.897022 | 12.500032 | 21.099344 |
| C | 18.164558 | 11.396104 | 21.441010 |
| C | 14.107886 | 8.621779  | 21.044090 |
| C | 15.046969 | 9.644585  | 21.090317 |
| C | 16.435913 | 9.387864  | 21.150610 |
| C | 16.798529 | 8.027000  | 21.175852 |
| C | 14.396269 | 13.129915 | 21.283966 |
| C | 10.096967 | 11.639420 | 23.144886 |
| C | 11.139910 | 12.137750 | 22.377386 |

|   |           |           |           |
|---|-----------|-----------|-----------|
| C | 12.454986 | 12.269828 | 22.872501 |
| C | 12.681110 | 11.868377 | 24.209826 |
| C | 11.640790 | 11.384198 | 24.995789 |
| C | 10.350760 | 11.267102 | 24.467615 |
| H | 26.375500 | 29.272846 | 23.027946 |
| H | 24.345592 | 9.551670  | 23.035002 |
| H | 8.248232  | 21.361208 | 23.016056 |
| C | 15.878105 | 6.988547  | 21.126207 |
| C | 14.516399 | 7.286582  | 21.060589 |
| H | 15.585949 | 23.172787 | 29.536907 |
| H | 15.479124 | 24.816355 | 31.397570 |
| H | 17.284435 | 24.859566 | 33.121197 |
| H | 19.216082 | 23.267437 | 32.933586 |
| H | 24.348104 | 22.262667 | 29.503582 |
| H | 25.942087 | 21.667715 | 31.304401 |
| H | 25.295010 | 19.968418 | 33.027973 |
| H | 23.054279 | 18.854084 | 32.869335 |
| H | 23.463734 | 24.361135 | 29.086969 |
| H | 23.494045 | 24.297710 | 31.567457 |
| H | 21.731365 | 25.517254 | 32.860313 |
| H | 19.922079 | 26.735947 | 31.621971 |
| H | 27.399626 | 17.295200 | 27.812653 |
| H | 29.740475 | 17.690351 | 28.537439 |
| H | 30.528399 | 20.017462 | 28.999487 |
| H | 28.954130 | 21.944700 | 28.672966 |
| H | 25.315651 | 26.254435 | 29.596802 |
| H | 25.548870 | 28.566628 | 25.192688 |
| H | 25.494616 | 29.909582 | 27.293167 |
| H | 25.411331 | 28.749369 | 29.503416 |
| H | 18.226612 | 28.120893 | 27.750864 |
| H | 16.693163 | 29.945065 | 28.455090 |
| H | 14.296279 | 29.448210 | 28.934322 |
| H | 13.435923 | 27.105396 | 28.662281 |
| H | 14.186336 | 21.222279 | 29.118893 |
| H | 14.248414 | 21.258062 | 31.596546 |
| H | 14.061329 | 19.115925 | 32.875446 |
| H | 13.914809 | 16.946230 | 31.618444 |
| H | 17.160679 | 17.899664 | 32.920334 |
| H | 16.841948 | 15.417142 | 33.088409 |
| H | 17.836573 | 13.926910 | 31.343645 |
| H | 19.157200 | 14.908137 | 29.489542 |
| H | 24.119289 | 10.637115 | 25.050442 |
| H | 25.360880 | 9.938153  | 27.090742 |
| H | 24.541552 | 10.638593 | 29.344538 |
| H | 22.494120 | 12.067315 | 29.532255 |
| H | 26.705866 | 10.575354 | 22.748257 |
| H | 28.853334 | 9.562092  | 21.999962 |

|   |           |           |           |
|---|-----------|-----------|-----------|
| H | 30.497274 | 10.949154 | 20.733383 |
| H | 29.937635 | 13.318264 | 20.144125 |
| F | 20.305000 | 9.096259  | 21.104187 |
| H | 20.123909 | 6.949402  | 22.569891 |
| H | 24.036917 | 7.461429  | 24.353828 |
| H | 21.918154 | 6.157871  | 24.134010 |
| H | 19.225050 | 11.311881 | 26.621452 |
| H | 19.775673 | 8.967820  | 27.261103 |
| H | 18.454832 | 7.076466  | 26.319326 |
| H | 16.584133 | 7.543969  | 24.704893 |
| H | 16.864340 | 11.069929 | 28.676952 |
| H | 14.410713 | 10.683471 | 29.021881 |
| H | 12.795085 | 12.536546 | 28.568628 |
| H | 13.631941 | 14.761337 | 27.854837 |
| H | 16.245329 | 5.962060  | 21.148804 |
| H | 13.782361 | 6.480187  | 21.035231 |
| H | 13.049078 | 8.874609  | 21.003523 |
| H | 14.718674 | 10.680137 | 21.111841 |
| H | 27.549364 | 12.315619 | 27.743151 |
| H | 29.408482 | 11.392074 | 26.323463 |
| H | 30.140207 | 12.652467 | 24.290564 |
| H | 29.033335 | 14.788630 | 23.694288 |
| H | 30.338381 | 20.486170 | 21.263493 |
| H | 32.731682 | 19.903049 | 21.158230 |
| H | 34.463089 | 21.715034 | 21.123123 |
| H | 33.715096 | 24.114870 | 21.170595 |
| H | 32.202805 | 23.493330 | 24.867014 |
| H | 31.640411 | 25.449940 | 26.336365 |
| H | 29.302277 | 25.743685 | 27.162407 |
| H | 27.544968 | 24.092340 | 26.533766 |
| F | 29.093056 | 26.108919 | 21.301920 |
| H | 30.872086 | 27.149330 | 22.845654 |
| H | 30.480139 | 29.119884 | 24.353601 |
| H | 28.224356 | 30.176201 | 24.440886 |
| H | 24.554668 | 30.855392 | 22.675102 |
| H | 24.464491 | 33.180000 | 21.800558 |
| H | 22.446032 | 33.956333 | 20.552246 |
| H | 20.542067 | 32.369305 | 20.153278 |
| H | 22.481731 | 30.707113 | 27.847847 |
| H | 22.294237 | 32.826591 | 26.508011 |
| H | 20.867712 | 32.862190 | 24.458944 |
| H | 19.627436 | 30.822195 | 23.778801 |
| H | 15.632268 | 29.417812 | 24.528868 |
| H | 15.769815 | 31.464418 | 25.932180 |
| H | 16.844439 | 33.528439 | 25.031652 |
| H | 17.750311 | 33.534588 | 22.687803 |
| H | 14.148441 | 29.166574 | 21.153847 |

|   |           |           |           |
|---|-----------|-----------|-----------|
| H | 13.404052 | 31.513226 | 21.067284 |
| H | 10.955673 | 32.057434 | 21.075199 |
| H | 9.292605  | 30.168604 | 21.162054 |
| H | 12.336325 | 24.948826 | 26.668764 |
| H | 10.501798 | 29.136341 | 24.681686 |
| H | 10.040562 | 25.698105 | 27.276291 |
| H | 9.112803  | 27.794302 | 26.292974 |
| F | 10.089648 | 25.096214 | 21.303421 |
| H | 6.623730  | 22.693039 | 24.362801 |
| H | 6.674573  | 25.181690 | 24.262808 |
| H | 8.347402  | 26.339033 | 22.789701 |
| H | 11.754761 | 21.882788 | 29.646646 |
| H | 9.440868  | 20.945942 | 29.647018 |
| H | 8.255569  | 20.564175 | 27.481379 |
| H | 9.357206  | 21.190128 | 25.338755 |
| H | 21.527990 | 14.708735 | 29.077309 |
| H | 21.470961 | 14.670170 | 31.558683 |
| H | 23.463871 | 15.454746 | 32.856937 |
| H | 25.464212 | 16.332514 | 31.625854 |
| H | 32.419231 | 15.111126 | 22.743238 |
| H | 32.798515 | 15.932527 | 25.083431 |
| H | 31.470642 | 17.869114 | 25.942608 |
| H | 29.783016 | 18.960958 | 24.481789 |
| H | 10.427929 | 14.667567 | 23.702801 |
| H | 9.172855  | 17.086090 | 27.866224 |
| H | 7.403787  | 15.958557 | 26.492983 |
| H | 8.041955  | 14.748777 | 24.402409 |
| H | 13.689416 | 11.954926 | 24.613062 |
| H | 11.840704 | 11.093636 | 26.027464 |
| H | 9.537216  | 10.881405 | 25.082264 |
| H | 9.104856  | 11.552548 | 22.702368 |
| H | 8.793708  | 14.655216 | 20.076752 |
| H | 6.442657  | 15.485633 | 20.359980 |
| H | 6.028215  | 17.641428 | 21.552322 |
| H | 7.938783  | 18.912771 | 22.509279 |
